# Supplementary material for: The Effectiveness of Botulinum Toxin Type A (BoNT-A) Treatment in Brazilian Patients with Chronic Post-Stroke Spasticity: Results from the Observational, Multicenter, Prospective BCause Study
Source: MDPI journal article supplement (doi:10.3390/toxins12120770), 2020-12-04
Supplement: s1 [file s1]

# Supplementary Materials: The Effectiveness of Botulinum Toxin Type A (BoNT-A) Treatment in Brazilian Patients with Chronic Post-stroke Spasticity: Results from the Observational, Multicenter, Prospective BCause Study

Patricia Khan, Marcelo Riberto, João Amaury Frances, Regina Chueire and Ana Cristina Ferreira Garcia Amorim, Denise Xerez, Tae Mo Chung, Lucia Helena Costa Mercuri, Alexandre Luiz Longo, Sérgio Lianza, Pascal Maisonobe and Viviane C. Ruiz-Schutz

**Table S1.** Most frequently injected muscles at visits 1 and 2 (FAS).

| Muscle, <i>n</i> (%)             | Visit 1 ( <i>n</i> = 204) | Visit 2 ( <i>n</i> = 201) |
|----------------------------------|---------------------------|---------------------------|
| Pectoralis major                 | 131 (64.2)                | 114 (56.7)                |
| Flexor digitorum superficialis   | 133 (65.2)                | 115 (57.2)                |
| Biceps brachii                   | 119 (58.3)                | 104 (51.7)                |
| Gastrocnemius—medial and lateral | 120 (58.8)                | 117 (58.2)                |
| Brachioradialis                  | 90 (44.1)                 | 90 (44.8)                 |

The most frequently injected muscles were identified on study level, not on injection-cycle level. FAS, full analysis set.

**Table S2. (A) MAS in UL joints; (B) MAS in LL joints (FAS).****A)**

| Visit              | Score   | Shoulder     |            | Elbow        |            | Wrist        |            | Finger       |            | Thumb        |            |
|--------------------|---------|--------------|------------|--------------|------------|--------------|------------|--------------|------------|--------------|------------|
|                    |         | <i>n</i> (%) | 95% CI     | <i>n</i> (%) | 95% CI     | <i>n</i> (%) | 95% CI     | <i>n</i> (%) | 95% CI     | <i>n</i> (%) | 95% CI     |
| Baseline (visit 1) | 0       | 22 (10.9)    | 7.2, 16.0  | 6 (3.0)      | 1.2, 6.4   | 19 (9.4)     | 6.0, 14.3  | 15 (7.4)     | 4.5, 12.0  | 41 (20.4)    | 15.4, 26.5 |
|                    | 1       | 33 (16.3)    | 11.8, 22.1 | 23 (11.3)    | 7.6, 16.5  | 33 (16.3)    | 11.8, 22.1 | 26 (12.9)    | 8.9, 18.2  | 31 (15.4)    | 11.0, 21.1 |
|                    | 1+      | 49 (24.3)    | 18.8, 30.6 | 42 (20.7)    | 15.7, 26.8 | 41 (20.3)    | 15.3, 26.4 | 28 (13.9)    | 9.7, 19.4  | 42 (20.9)    | 15.8, 27.1 |
|                    | 2       | 47 (23.3)    | 18.0, 29.6 | 73 (36.0)    | 29.7, 42.8 | 52 (25.7)    | 20.2, 32.2 | 51 (25.2)    | 19.7, 31.7 | 44 (21.9)    | 16.7, 28.1 |
|                    | 3       | 50 (24.8)    | 19.3, 31.2 | 56 (27.6)    | 21.9, 34.1 | 47 (23.3)    | 18.0, 29.6 | 71 (35.1)    | 28.9, 42.0 | 38 (18.9)    | 14.1, 24.9 |
|                    | 4       | 1 (0.5)      | 0.0, 3.0   | 3 (1.5)      | 0.3, 4.5   | 10 (5.0)     | 2.6, 9.0   | 11 (5.4)     | 3.0, 9.6   | 5 (2.5)      | 0.9, 5.9   |
|                    | Missing | 2            |            | 1            |            | 2            |            | 2            |            | 3            |            |
| Visit 2            | 0       | 30 (14.7)    | 10.5, 20.3 | 9 (4.4)      | 2.2, 8.3   | 29 (14.2)    | 10.0, 19.7 | 18 (8.8)     | 5.6, 13.6  | 46 (22.5)    | 17.3, 28.8 |
|                    | 1       | 49 (24.0)    | 18.7, 30.3 | 37 (18.1)    | 13.4, 24.0 | 39 (19.1)    | 14.3, 25.1 | 43 (21.1)    | 16.0, 27.2 | 50 (24.5)    | 19.1, 30.9 |
|                    | 1+      | 46 (22.5)    | 17.3, 28.8 | 75 (36.8)    | 30.4, 43.6 | 53 (26.0)    | 20.4, 32.4 | 38 (18.6)    | 13.9, 24.6 | 39 (19.1)    | 14.3, 25.1 |
|                    | 2       | 53 (26.0)    | 20.4, 32.4 | 54 (26.5)    | 20.9, 32.9 | 54 (26.5)    | 20.9, 32.9 | 58 (28.4)    | 22.7, 35.0 | 43 (21.1)    | 16.0, 27.2 |
|                    | 3       | 26 (12.7)    | 8.8, 18.1  | 26 (12.7)    | 8.8, 18.1  | 28 (13.7)    | 9.6, 19.2  | 41 (20.1)    | 15.1, 26.2 | 21 (10.3)    | 6.8, 15.3  |
|                    | 4       | 0            | 0.0, 2.2   | 3 (1.5)      | 0.3, 4.4   | 1 (0.5)      | 0.0, 3.0   | 6 (2.9)      | 1.2, 6.4   | 5 (2.5)      | 0.9, 5.8   |
|                    | Missing | 0            |            | 0            |            | 0            |            | 0            |            | 0            |            |
| Visit 3            | 0       | 27 (15.0)    | 10.5, 21.0 | 19 (10.6)    | 6.8, 16.0  | 27 (15.0)    | 10.5, 21.0 | 19 (10.6)    | 6.8, 16.0  | 37 (20.6)    | 15.3, 27.1 |
|                    | 1       | 59 (32.8)    | 26.3, 39.9 | 41 (22.8)    | 17.2, 29.5 | 42 (23.3)    | 17.7, 30.1 | 34 (18.9)    | 13.8, 25.3 | 46 (25.6)    | 19.7, 32.4 |
|                    | 1+      | 43 (23.9)    | 18.2, 30.6 | 56 (31.1)    | 24.8, 38.2 | 50 (27.8)    | 21.7, 34.7 | 45 (25.0)    | 19.2, 31.8 | 43 (23.9)    | 18.2, 30.6 |
|                    | 2       | 34 (18.9)    | 13.8, 25.3 | 44 (24.4)    | 18.7, 31.2 | 41 (22.8)    | 17.2, 29.5 | 50 (27.8)    | 21.7, 34.7 | 37 (20.6)    | 15.3, 27.1 |
|                    | 3       | 17 (9.4)     | 5.9, 14.7  | 20 (11.1)    | 7.2, 16.6  | 20 (11.1)    | 7.2, 16.6  | 27 (15.0)    | 10.5, 21.0 | 12 (6.7)     | 3.7, 11.4  |
|                    | 4       | 0            | 0.0, 2.5   | 0            | 0.0, 2.5   | 0            | 0.0, 2.5   | 5 (2.8)      | 1.0, 6.5   | 5 (2.8)      | 1.0, 6.5   |
|                    | Missing | 24           |            | 24           |            | 24           |            | 24           |            | 24           |            |

## B)

| Visit              | Score   | Hip          |            | Knee         |            | Ankle        |            | Toe          |            |
|--------------------|---------|--------------|------------|--------------|------------|--------------|------------|--------------|------------|
|                    |         | <i>n</i> (%) | 95% CI     | <i>n</i> (%) | 95% CI     | <i>n</i> (%) | 95% CI     | <i>n</i> (%) | 95% CI     |
| Baseline (Visit 1) | 0       | 81 (45.5)    | 38.4, 52.8 | 37 (20.8)    | 15.4, 27.4 | 12 (6.7)     | 3.7, 11.4  | 74 (41.8)    | 34.8, 49.2 |
|                    | 1       | 34 (19.1)    | 14.0, 25.5 | 37 (20.8)    | 15.4, 27.4 | 16 (8.9)     | 5.5, 14.0  | 37 (20.9)    | 15.5, 27.5 |
|                    | 1+      | 25 (14.0)    | 9.6, 20.0  | 30 (16.9)    | 12.0, 23.1 | 25 (13.9)    | 9.5, 19.8  | 18 (10.2)    | 6.5, 15.6  |
|                    | 2       | 21 (11.8)    | 7.8, 17.4  | 46 (25.8)    | 19.9, 32.8 | 55 (30.6)    | 24.3, 37.6 | 27 (15.3)    | 10.7, 21.3 |
|                    | 3       | 15 (8.4)     | 5.1, 13.5  | 24 (13.5)    | 9.2, 19.3  | 61 (33.9)    | 27.4, 41.1 | 17 (9.6)     | 6.0, 14.9  |
|                    | 4       | 2 (1.1)      | 0.0, 4.3   | 4 (2.2)      | 0.7, 5.8   | 11 (6.1)     | 3.3, 10.7  | 4 (2.3)      | 0.7, 5.9   |
|                    | Missing | 26           |            | 26           |            | 24           |            | 27           |            |
| Visit 2            | 0       | 82 (45.8)    | 38.7, 53.1 | 42 (23.0)    | 17.4, 29.6 | 8 (4.4)      | 2.1, 8.5   | 83 (46.1)    | 39.0, 53.4 |
|                    | 1       | 34 (19.0)    | 13.9, 25.4 | 36 (19.7)    | 14.5, 26.1 | 19 (10.4)    | 6.7, 15.7  | 31 (17.2)    | 12.4, 23.4 |
|                    | 1+      | 22 (12.3)    | 8.2, 18.0  | 45 (24.6)    | 18.9, 31.3 | 43 (23.5)    | 17.9, 30.2 | 22 (12.2)    | 8.1, 17.9  |
|                    | 2       | 31 (17.3)    | 12.4, 23.6 | 45 (24.6)    | 18.9, 31.3 | 66 (36.1)    | 29.5, 43.2 | 27 (15.0)    | 10.5, 21.0 |
|                    | 3       | 8 (4.5)      | 2.1, 8.7   | 13 (7.1)     | 4.1, 11.9  | 42 (23.0)    | 17.4, 29.6 | 15 (8.3)     | 5.0, 13.4  |
|                    | 4       | 2 (1.1)      | 0.0, 4.2   | 2 (1.1)      | 0.0, 4.2   | 5 (2.7)      | 1.0, 6.4   | 2 (1.1)      | 0.0, 4.2   |
|                    | Missing | 25           |            | 21           |            | 21           |            | 24           |            |
| Visit 3            | 0       | 86 (53.1)    | 45.4, 60.6 | 48 (29.6)    | 23.1, 37.1 | 8 (5.0)      | 2.4, 9.6   | 78 (48.2)    | 40.9, 56.1 |
|                    | 1       | 33 (20.4)    | 14.9, 27.3 | 38 (23.5)    | 17.6, 30.6 | 30 (18.6)    | 13.3, 25.4 | 29 (18.0)    | 12.8, 24.7 |
|                    | 1+      | 19 (11.7)    | 7.6, 17.7  | 33 (20.4)    | 14.9, 27.3 | 46 (28.6)    | 22.1, 36.0 | 19 (11.8)    | 7.6, 17.8  |
|                    | 2       | 16 (9.9)     | 6.1, 15.5  | 34 (21.0)    | 15.4, 27.9 | 48 (29.8)    | 23.3, 37.3 | 23 (14.3)    | 9.6, 20.6  |
|                    | 3       | 7 (4.3)      | 1.9, 8.8   | 8 (4.9)      | 2.4, 9.6   | 23 (14.3)    | 9.6, 20.6  | 10 (6.2)     | 3.3, 11.2  |
|                    | 4       | 1 (0.6)      | 0.0, 3.8   | 1 (0.6)      | 0.0, 3.8   | 6 (3.7)      | 1.5, 8.1   | 2 (1.2)      | 0.1, 4.7   |
|                    | Missing | 42           |            | 42           |            | 43           |            | 43           |            |

Percentages are based on the number of non-missing observations in the FAS. Scores: 0 = no increase in muscle tone, 1 = slight increase in muscle tone, 1+ = slight increase in muscle tone, 2 = more marked increase in muscle tone, 3 = considerable increase in muscle tone, 4 = affected part is rigid in flexion or extension. FAS, full analysis set; LL, lower limb; MAS, Modified Ashworth Scale; UL, upper limb.

**Table S3.** Barthel Index score for activities of daily living (FAS).

| Item     | Visit              | Level of Performance                                                  | n (%)      | 95% CI     |
|----------|--------------------|-----------------------------------------------------------------------|------------|------------|
| Feeding  | Baseline (visit 1) | Unable                                                                | 11 (5.4)   | 2.9, 9.5   |
|          |                    | Needs help cutting, spreading butter, etc., or requires modified diet | 140 (68.6) | 62.0, 74.6 |
|          |                    | Independent                                                           | 52 (26.0)  | 20.4, 32.4 |
|          |                    | Missing                                                               | 0          |            |
|          | Visit 3            | Unable                                                                | 13 (7.2)   | 4.2, 12.2  |
|          |                    | Needs help cutting, spreading butter, etc., or requires modified diet | 93 (51.7)  | 44.4, 58.9 |
|          |                    | Independent                                                           | 74 (41.1)  | 34.2, 48.4 |
|          |                    | Missing                                                               | 24         |            |
| Bathing  | Baseline (visit 1) | Dependent                                                             | 98 (48.0)  | 41.3, 54.9 |
|          |                    | Independent (or in shower)                                            | 106 (52.0) | 45.1, 58.7 |
|          |                    | Missing                                                               | 0          |            |
|          | Visit 3            | Dependent                                                             | 71 (39.4)  | 32.6, 46.7 |
|          |                    | Independent (or in shower)                                            | 109 (60.6) | 53.3, 67.4 |
|          |                    | Missing                                                               | 24         |            |
| Grooming | Baseline (visit 1) | Needs to help with personal care                                      | 86 (42.2)  | 35.6, 49.0 |
|          |                    | Independent face/hair/teeth/shaving (implements provided)             | 118 (57.8) | 51.0, 64.4 |
|          |                    | Missing                                                               | 0          |            |
|          | Visit 3            | Needs to help with personal care                                      | 58 (32.2)  | 25.8, 39.4 |
|          |                    | Independent face/hair/teeth/shaving (implements provided)             | 122 (67.8) | 60.6, 74.2 |
|          |                    | Missing                                                               | 24         |            |
| Dressing | Baseline (visit 1) | Dependent                                                             | 52 (25.5)  | 20.0, 31.9 |
|          |                    | Needs help but can do about half unaided                              | 101 (49.5) | 42.7, 56.3 |
|          |                    | Independent (including buttons, zips, laces, etc.)                    | 51 (25.0)  | 19.5, 31.4 |
|          |                    | Missing                                                               | 0          |            |
|          | Visit 3            | Dependent                                                             | 32 (17.8)  | 12.8, 24.1 |
|          |                    | Needs help but can do about half unaided                              | 85 (47.2)  | 40.1, 54.5 |
|          |                    | Independent (including buttons, zips, laces, etc.)                    | 63 (35.0)  | 28.4, 42.2 |
|          |                    | Missing                                                               | 24         |            |
| Bowels   | Baseline (visit 1) | Incontinent (or needs to be given enemas)                             | 14 (6.9)   | 4.0, 11.3  |
|          |                    | Occasional accident                                                   | 26 (12.7)  | 8.8, 18.1  |
|          |                    | Continent                                                             | 164 (80.4) | 74.4, 85.3 |
|          |                    | Missing                                                               | 0          |            |
|          | Visit 3            | Incontinent (or needs to be given enemas)                             | 6 (3.3)    | 1.4, 7.2   |
|          |                    | Occasional accident                                                   | 14 (7.8)   | 4.6, 12.7  |

|                           |                    |                                                                  |            |            |
|---------------------------|--------------------|------------------------------------------------------------------|------------|------------|
| Bladder                   | Baseline (visit 1) | Continent                                                        | 160 (88.9) | 83.4, 92.8 |
|                           |                    | Missing                                                          | 24         |            |
|                           |                    | Incontinent, or catheterized and unable to manage alone          | 23 (11.3)  | 7.6, 16.4  |
|                           |                    | Occasional accident                                              | 50 (24.5)  | 19.1, 30.9 |
|                           | Visit 3            | Continent                                                        | 131 (64.2) | 57.4, 70.5 |
|                           |                    | Missing                                                          | 0          |            |
|                           |                    | Incontinent, or catheterized and unable to manage alone          | 10 (5.6)   | 2.9, 10.0  |
|                           |                    | Occasional accident                                              | 26 (14.4)  | 10.0, 20.4 |
|                           |                    | Continent                                                        | 144 (80.0) | 73.5, 85.2 |
|                           |                    | Missing                                                          | 24         |            |
| Toilet use                | Baseline (visit 1) | Dependent                                                        | 49 (24.0)  | 18.7, 30.3 |
|                           |                    | Needs some help, but can do something alone                      | 46 (22.5)  | 17.3, 28.8 |
|                           |                    | Independent (on and off, dressing, wiping)                       | 109 (53.4) | 46.6, 60.2 |
|                           |                    | Missing                                                          | 0          |            |
|                           | Visit 3            | Dependent                                                        | 24 (13.3)  | 9.1, 19.1  |
|                           |                    | Needs some help, but can do something alone                      | 44 (24.4)  | 18.7, 31.2 |
|                           |                    | Independent (on and off, dressing, wiping)                       | 112 (62.2) | 54.9, 69.0 |
|                           |                    | Missing                                                          | 24         |            |
|                           | Baseline (visit 1) | Unable, no sitting balance                                       | 20 (9.8)   | 6.4, 14.7  |
|                           |                    | Major help (one or two people, physical), can sit                | 41 (20.1)  | 15.1, 26.2 |
| Transfers                 |                    | Minor help (verbal or physical)                                  | 30 (14.7)  | 10.5, 20.3 |
|                           |                    | Independent                                                      | 113 (55.4) | 48.5, 62.1 |
|                           | Visit 3            | Missing                                                          | 0          |            |
|                           |                    | Unable, no sitting balance                                       | 13 (7.2)   | 4.2, 12.1  |
|                           |                    | Major help (one or two people, physical), can sit                | 34 (18.9)  | 13.8, 25.3 |
|                           |                    | Minor help (verbal or physical)                                  | 26 (14.4)  | 10.0, 20.4 |
|                           |                    | Independent                                                      | 107 (59.4) | 52.1, 66.4 |
|                           |                    | Missing                                                          | 24         |            |
|                           | Baseline (visit 1) | Immobile or < 50 yards                                           | 67 (32.8)  | 26.8, 39.6 |
|                           |                    | Wheelchair independent, including corners, > 50 yards            | 13 (6.4)   | 3.7, 10.7  |
| Mobility on level surface |                    | Walks with help of one person (verbal or physical) > 50 yards    | 49 (24.0)  | 18.7, 30.3 |
|                           |                    | Independent (but may use any aid; for example, stick) > 50 yards | 75 (36.8)  | 30.4, 43.6 |
|                           | Visit 3            | Missing                                                          | 0          |            |
|                           |                    | Immobile or < 50 yards                                           | 45 (25.0)  | 19.2, 31.8 |
|                           |                    | Wheelchair independent, including corners, > 50 yards            | 7 (3.9)    | 1.7, 8.0   |
|                           |                    | Walks with help of one person (verbal or physical) > 50 yards    | 44 (24.4)  | 18.7, 31.2 |

|        |                                                                  |                                             |           |            |
|--------|------------------------------------------------------------------|---------------------------------------------|-----------|------------|
| Stairs | Independent (but may use any aid; for example, stick) > 50 yards |                                             | 84 (46.7) | 39.5, 53.9 |
|        | Missing                                                          |                                             | 24        |            |
|        | Baseline (visit 1)                                               | Unable                                      | 70 (34.3) | 28.1, 41.1 |
|        |                                                                  | Needs help (verbal, physical, carrying aid) | 74 (36.3) | 30.0, 43.1 |
|        | Visit 2                                                          | Independent                                 | 60 (29.4) | 23.6, 36.0 |
|        |                                                                  | Missing                                     | 0         |            |
|        |                                                                  | Unable                                      | 53 (29.4) | 23.3, 36.5 |
|        |                                                                  | Needs help (verbal, physical, carrying aid) | 57 (31.7) | 25.3, 38.8 |
|        |                                                                  | Independent                                 | 70 (38.9) | 32.1, 46.2 |
|        |                                                                  | Missing                                     | 24        |            |

Percentages are based on the number of non-missing observations in the FAS. FAS, full analysis set.

**Table S4.** Summary of serious adverse events and causality in patients receiving abobotulinumtoxinA.

| Serious Adverse events<br>Reported Term             | Events, <i>n</i> |
|-----------------------------------------------------|------------------|
| <b>Possibly related, per sponsor assessment</b>     |                  |
| Decompensated chronic obstructive pulmonary disease | 1                |
| Diarrhea                                            | 1                |
| Fall                                                | 2                |
| Hypotonia                                           | 2                |
| Lost mobility of lower limbs                        | 1                |
| Muscular weakness                                   | 2                |
| Pneumonia                                           | 1                |
| <b>Non-related, per sponsor assessment</b>          |                  |
| Anemia                                              | 1                |
| Bone skull infection                                | 1                |
| Cardiac arrest                                      | 1                |
| Cardiac failure                                     | 1                |
| Cardiorespiratory arrest                            | 2                |
| Cerebrovascular accident                            | 2                |
| Cognitive worsens                                   | 1                |
| Cranial vault infection                             | 1                |
| Dehydration                                         | 1                |
| Delirium                                            | 1                |
| Dental operation                                    | 1                |
| Fall                                                | 2                |
| Falling from height                                 | 1                |
| Femur fracture                                      | 3                |
| Hypertensive crisis                                 | 1                |
| Intravesical clot                                   | 1                |
| Metabolic acidosis                                  | 1                |
| Myocardial infarction                               | 1                |
| Meningitis                                          | 1                |
| Passed away *                                       | 1                |
| Pneumonia                                           | 4                |
| Renal impairment                                    | 1                |
| Seizure                                             | 1                |
| Sepsis                                              | 2                |
| Septic shock                                        | 1                |
| Urinary tract infection                             | 2                |

\* Cause of death was unexplained and not reported.

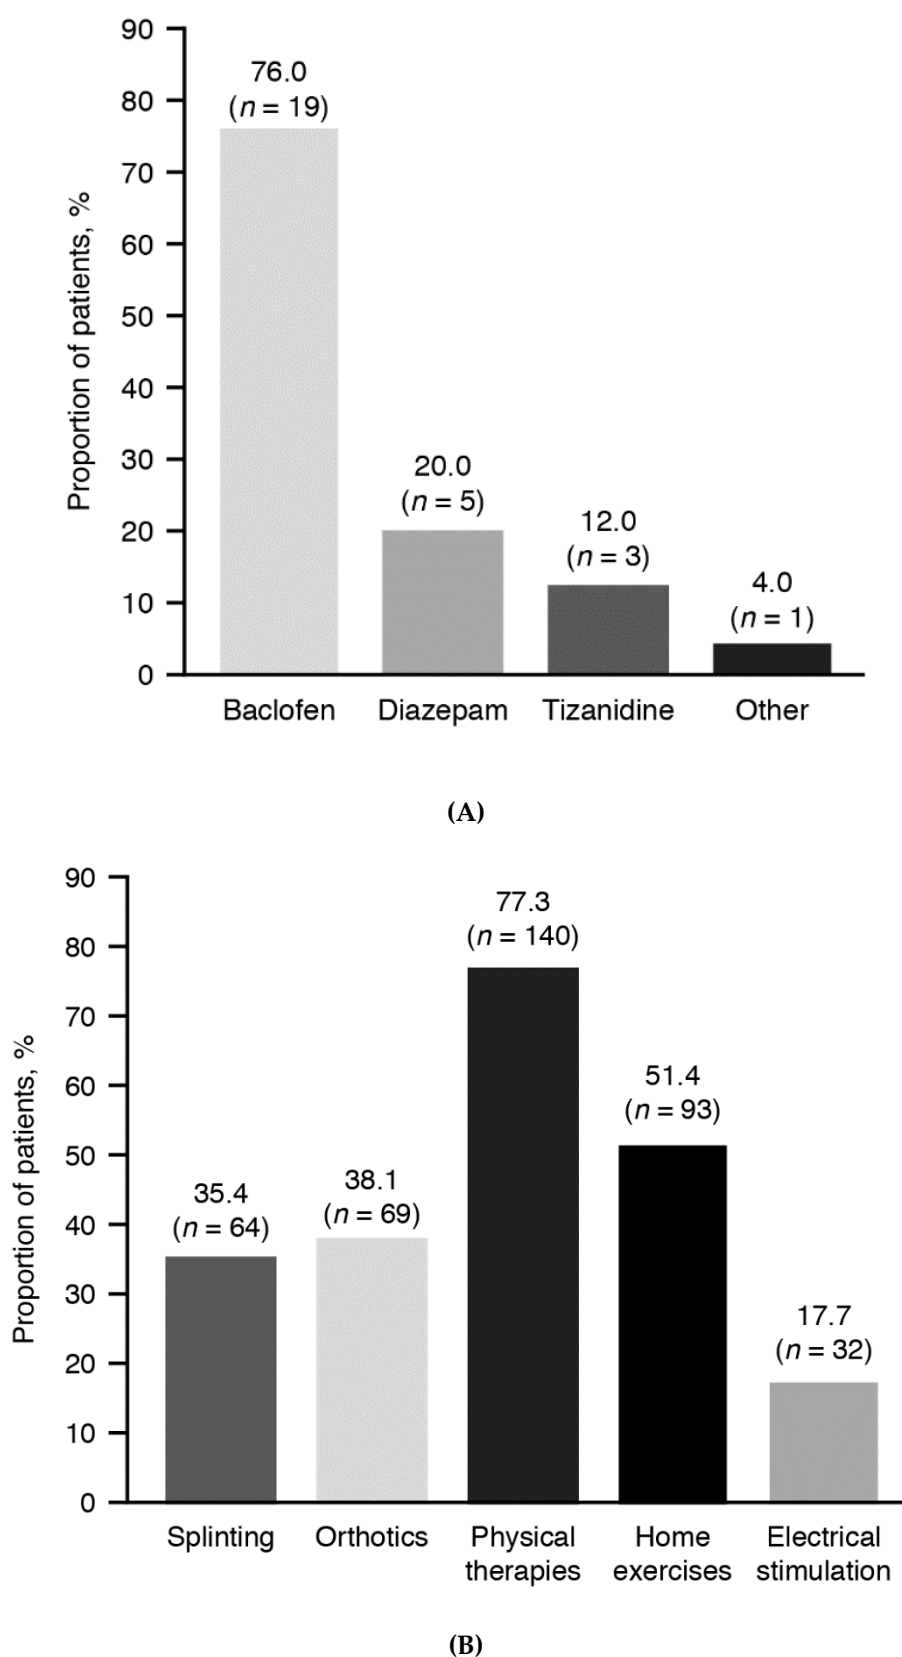

**Figure S1.** Previous and concomitant therapies: (A) concomitant medications for spasticity ( $n = 25$ ); (B) concomitant non-drug therapies for spasticity ( $n = 181$ ) (23 patients in the FAS were missing data, and therefore were not included in this analysis). FAS, full analysis set.



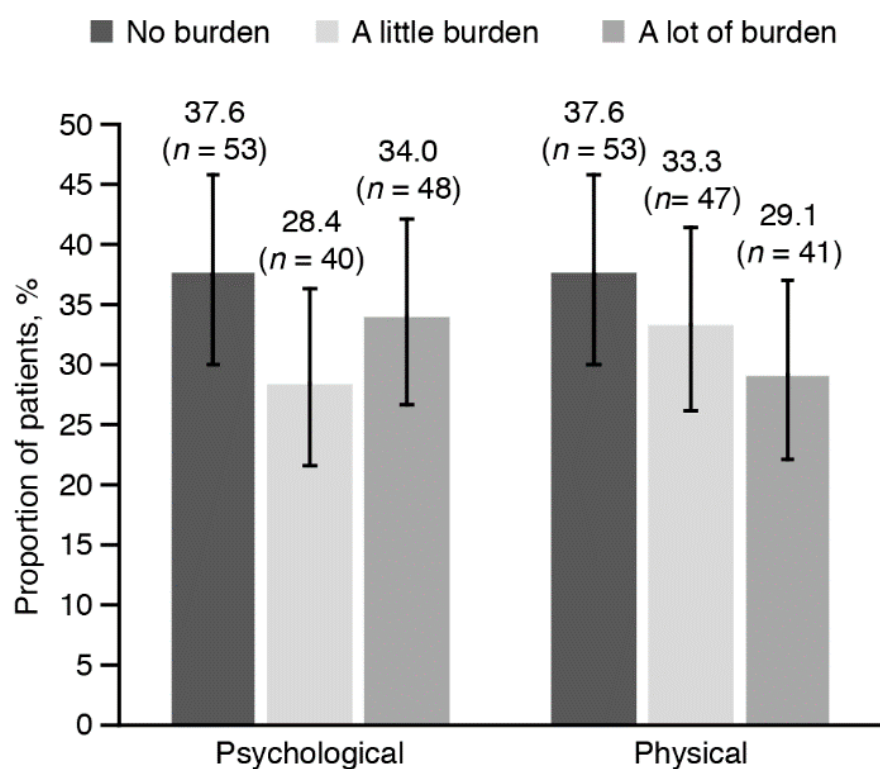

**Figure S2.** Caregiver's physical and psychological burden at baseline (FAS). Error bars represent 95% CI. Percentages are based on the number of non-missing observations in the FAS; data were available for 141 caregivers. FAS, full analysis set.
